# Supplementary material for: Fluorescence Quenching-Based Mechanism for Determination of Hypochlorite by Coumarin-Derived Sensors
Source: PubMed Central journal article supplement (PMC6358793; doi:10.3390/ijms20020281), 2019-01-11
Supplement: ijms-20-00281-s001.pdf [file ijms-20-00281-s001.pdf]

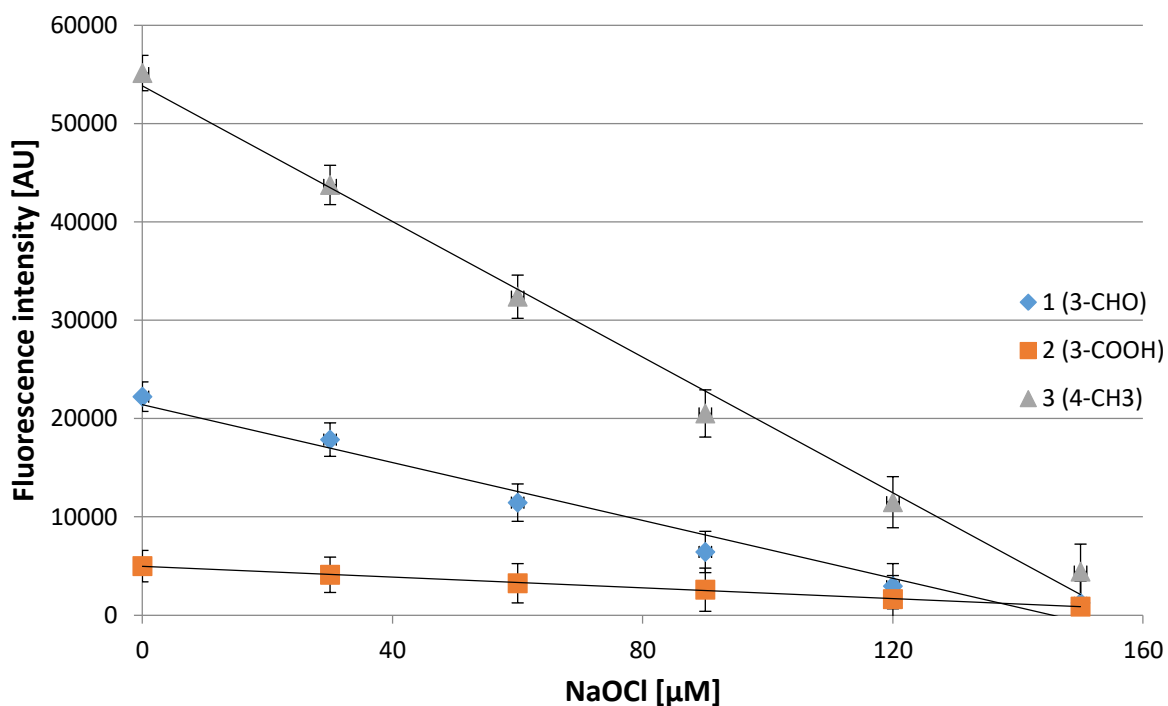

Figure 1S. Changes in fluorescence intensity of **1-3** induced by an increase in NaOCl concentration, at pH 3,  $\lambda_{\text{Ex}}$  289 nm, and the temperature of 25 °C.

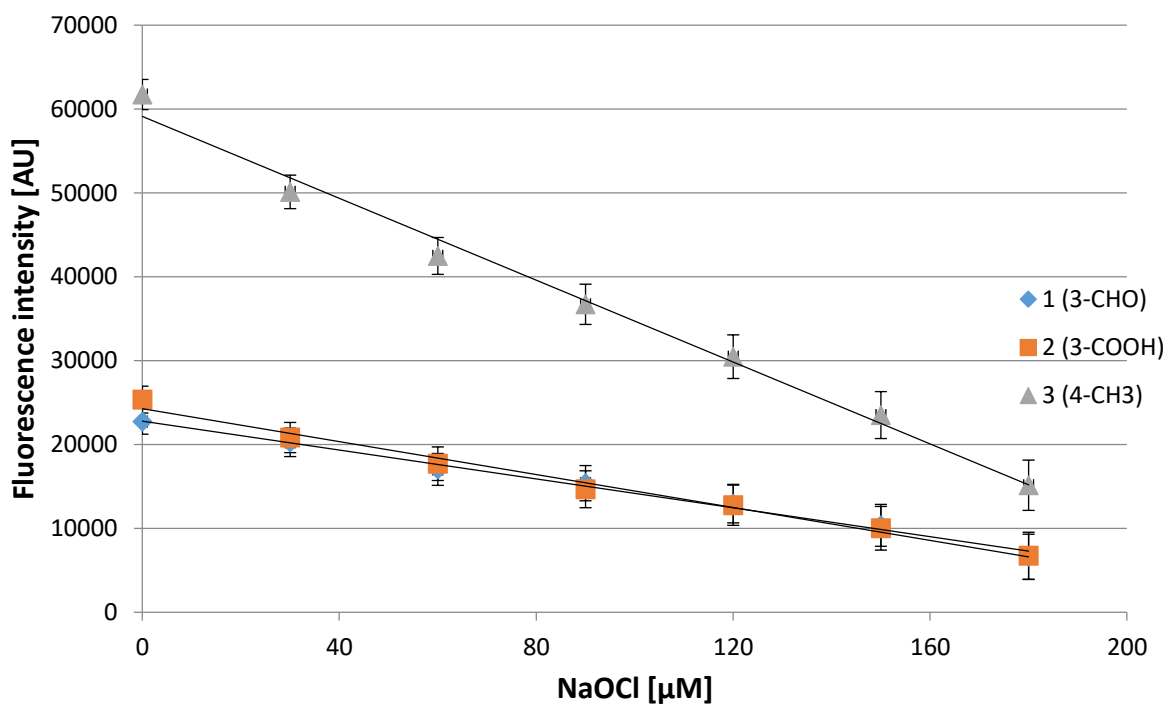

Figure 2S. Changes in fluorescence intensity of **1-3** induced by an increase in NaOCl concentration, at pH 7.4,  $\lambda_{\text{Ex}}$  289 nm, and the temperature of 25 °C.

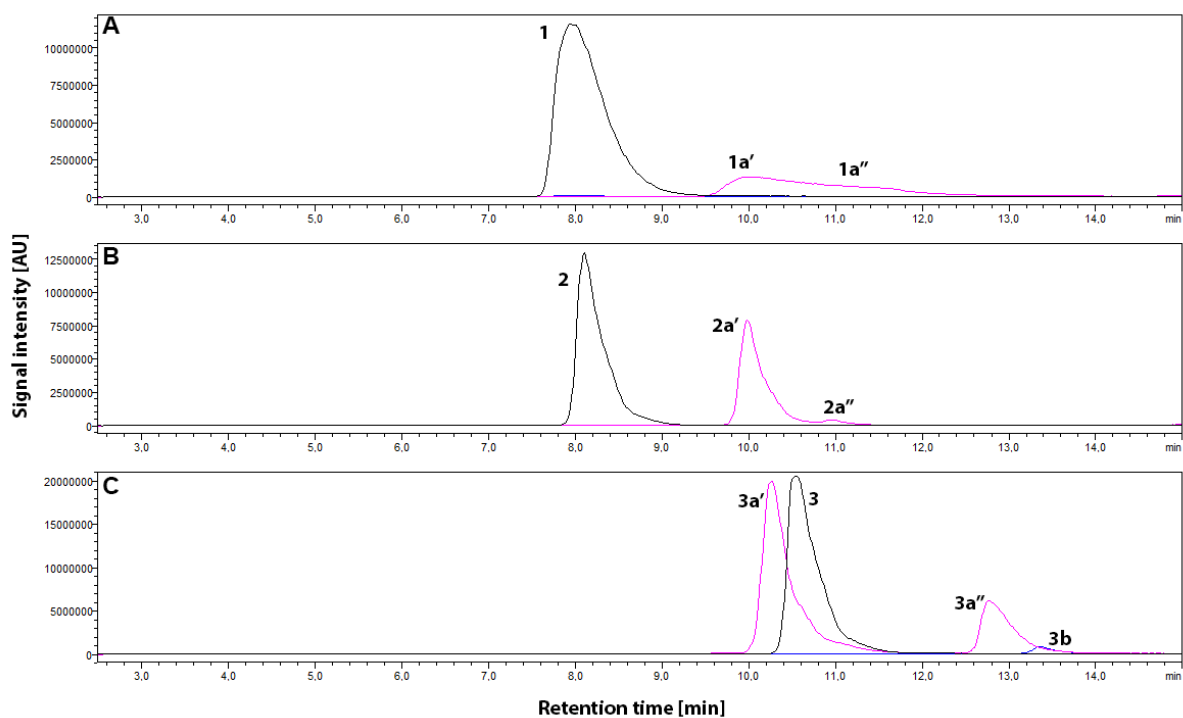

Figure 3S. HPLC-MS traces of chlorination products of 150  $\mu\text{M}$  probes **1** (A), **2** (B), **3** (C) by 150  $\mu\text{M}$  NaOCl at pH 5 and the temperature of 25  $^{\circ}\text{C}$ . Peak numbering is presented in Table 1.

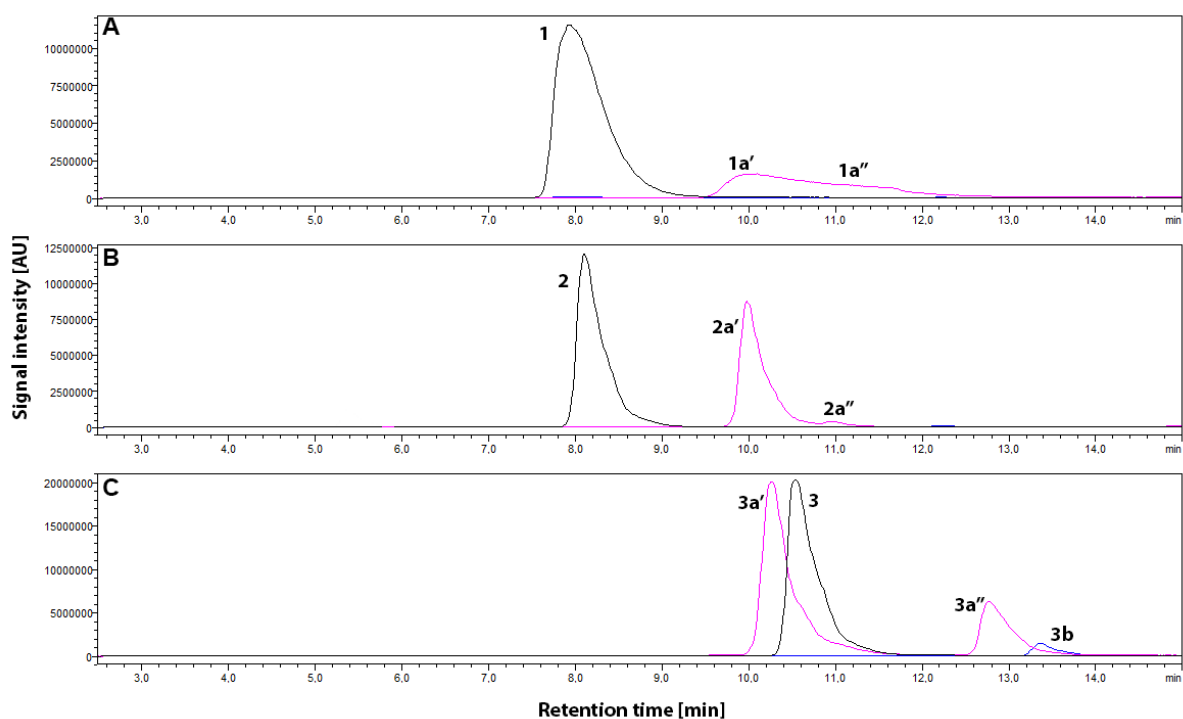

Figure 4S. HPLC-MS traces of chlorination products of 150  $\mu\text{M}$  probes **1** (A), **2** (B), **3** (C) by 150  $\mu\text{M}$  NaOCl at pH 7.4 and the temperature of 25  $^{\circ}\text{C}$ . Peak numbering is presented in Table 1.

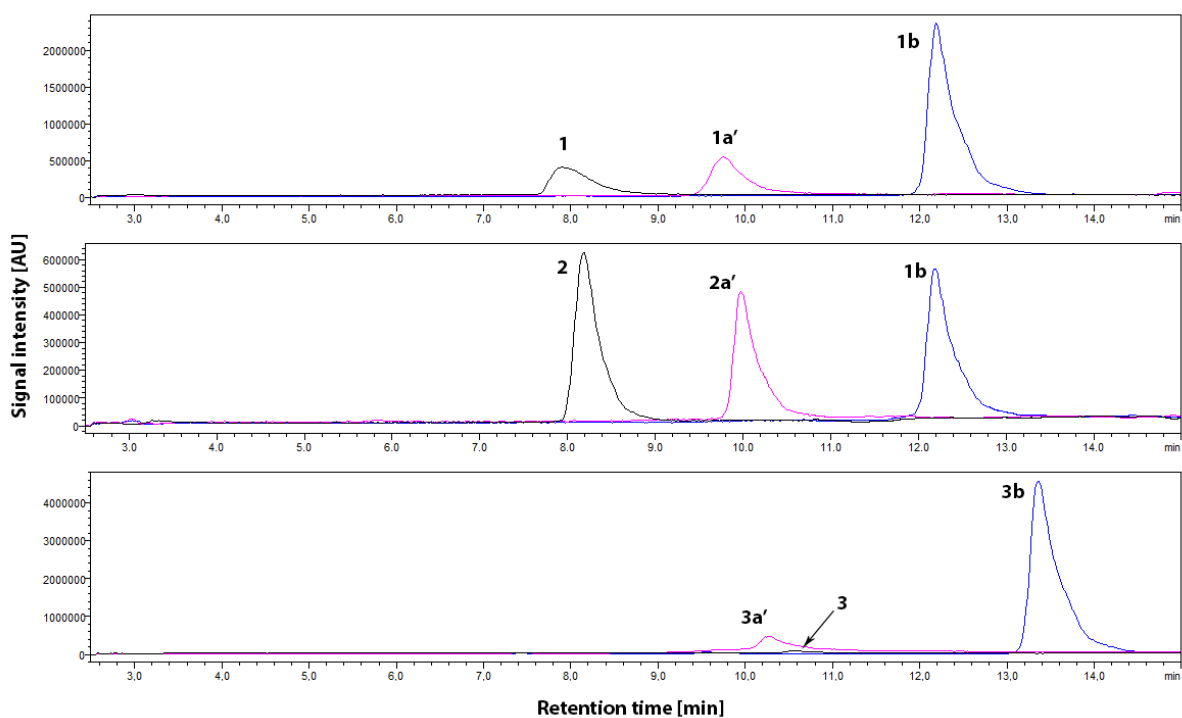

Figure 5S. HPLC-MS traces of chlorination products of 150  $\mu\text{M}$  probes **1-3** by 5-fold excess NaOCl at pH 3 and the temperature of 25  $^{\circ}\text{C}$ . Peak numbering is presented in Table 1S.

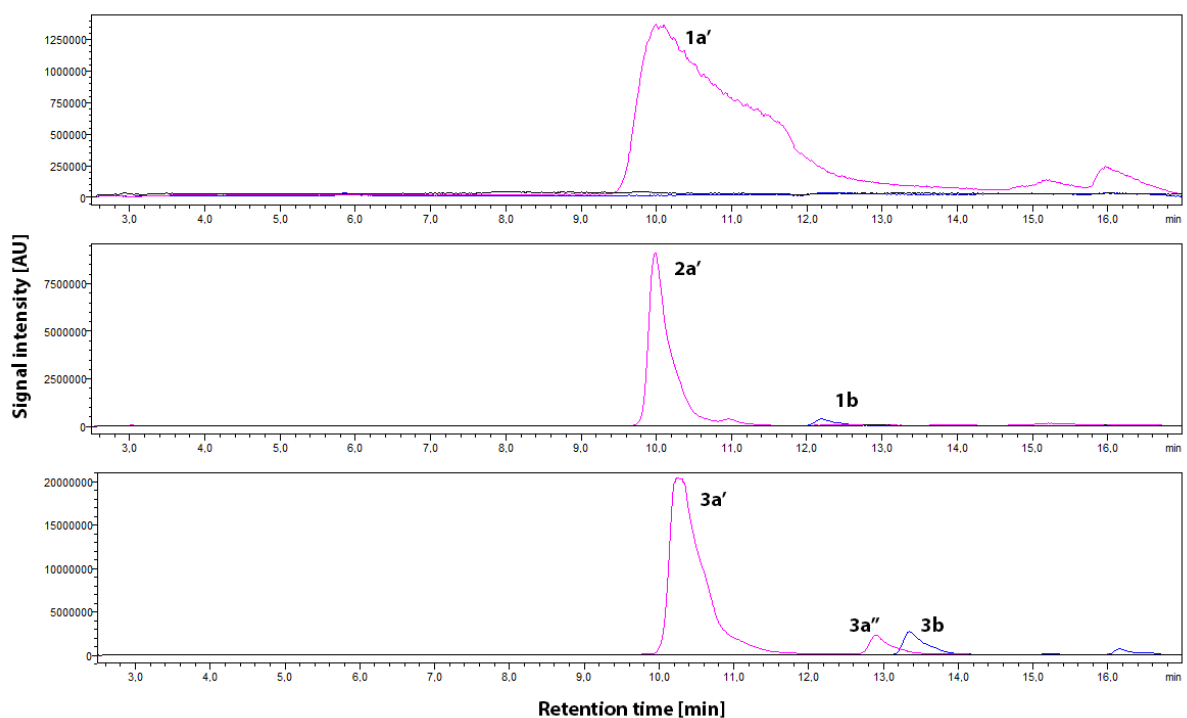

Figure 6S. HPLC-MS traces of chlorination products of 150  $\mu\text{M}$  probes **1-3** by 5-fold excess NaOCl at pH 5 and the temperature of 25  $^{\circ}\text{C}$ . Peak numbering is presented in Table 1S.

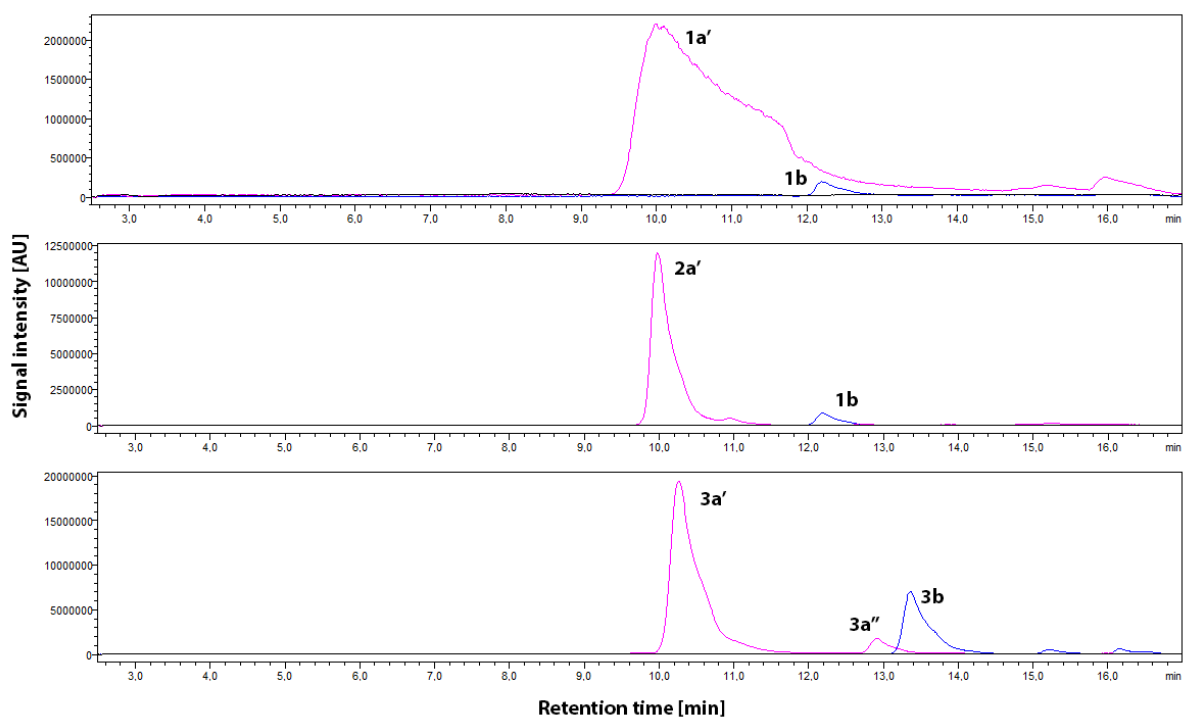

Figure 7S. HPLC-MS traces of chlorination products of 150  $\mu\text{M}$  probes **1-3** by 5-fold excess NaOCl at pH 7.4 and the temperature of 25  $^{\circ}\text{C}$ . Peak numbering is presented in Table 1S.

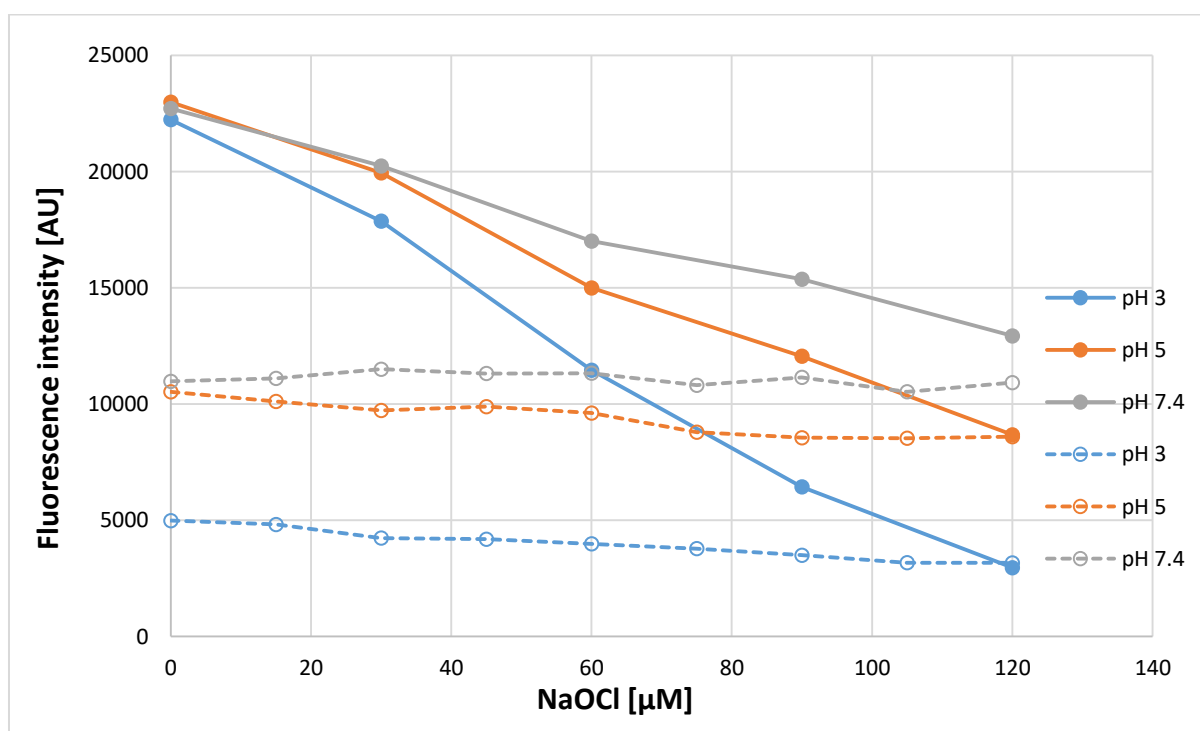

Figure 8S. Comparison of sodium hypochlorite-induced changes in fluorescence intensity of **1** (150  $\mu\text{M}$ ) (permanent lines), with that recorded upon the addition of Trolox (40  $\mu\text{M}$ ) (dashed lines). The measurements were carried out at  $\lambda_{\text{Ex}}$  289 nm,  $\lambda_{\text{Em}}$  464 nm, and a temperature of 25  $^{\circ}\text{C}$ .

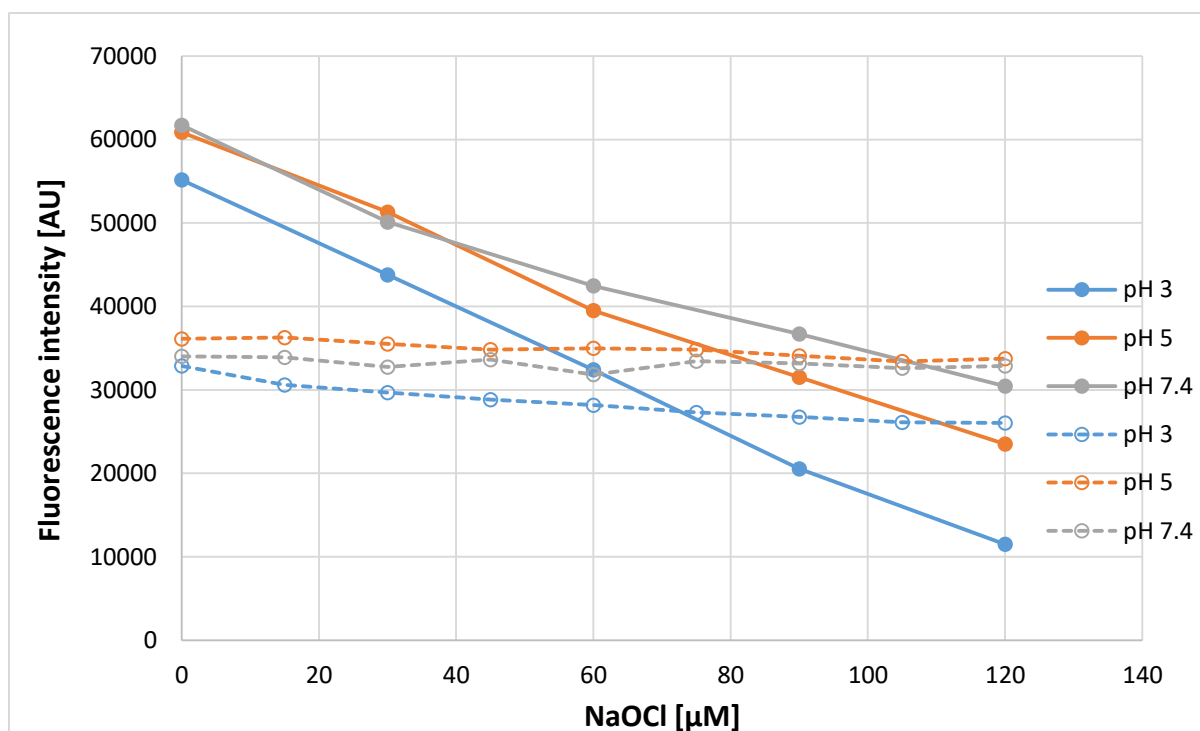

Figure 9S. Comparison of sodium hypochlorite-induced changes in fluorescence intensity of **3** (150  $\mu\text{M}$ ) (permanent lines), with that recorded upon the addition of Trolox (40  $\mu\text{M}$ ) (dashed lines). The measurements were carried out at  $\lambda_{\text{Ex}}$  289 nm,  $\lambda_{\text{Em}}$  450 nm, and a temperature of 25  $^{\circ}\text{C}$ .

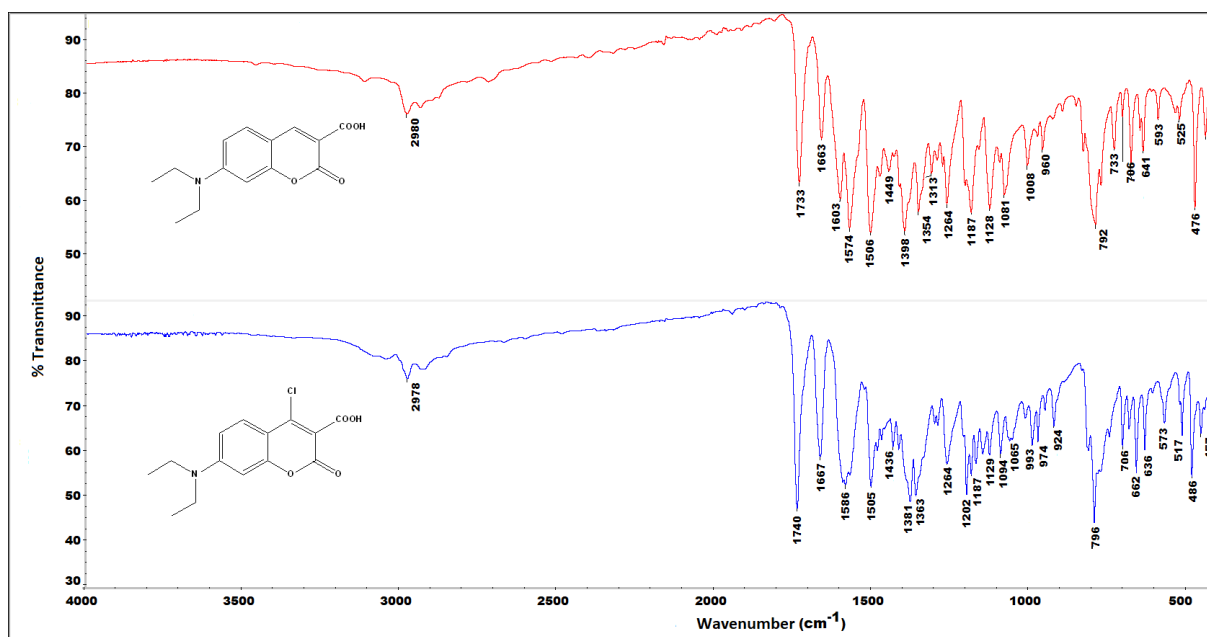

Figure 10S. Comparison of IR(ATR) Spectra of **2** (upper) and its corresponding chlorinated derivative **2a'** (bottom)

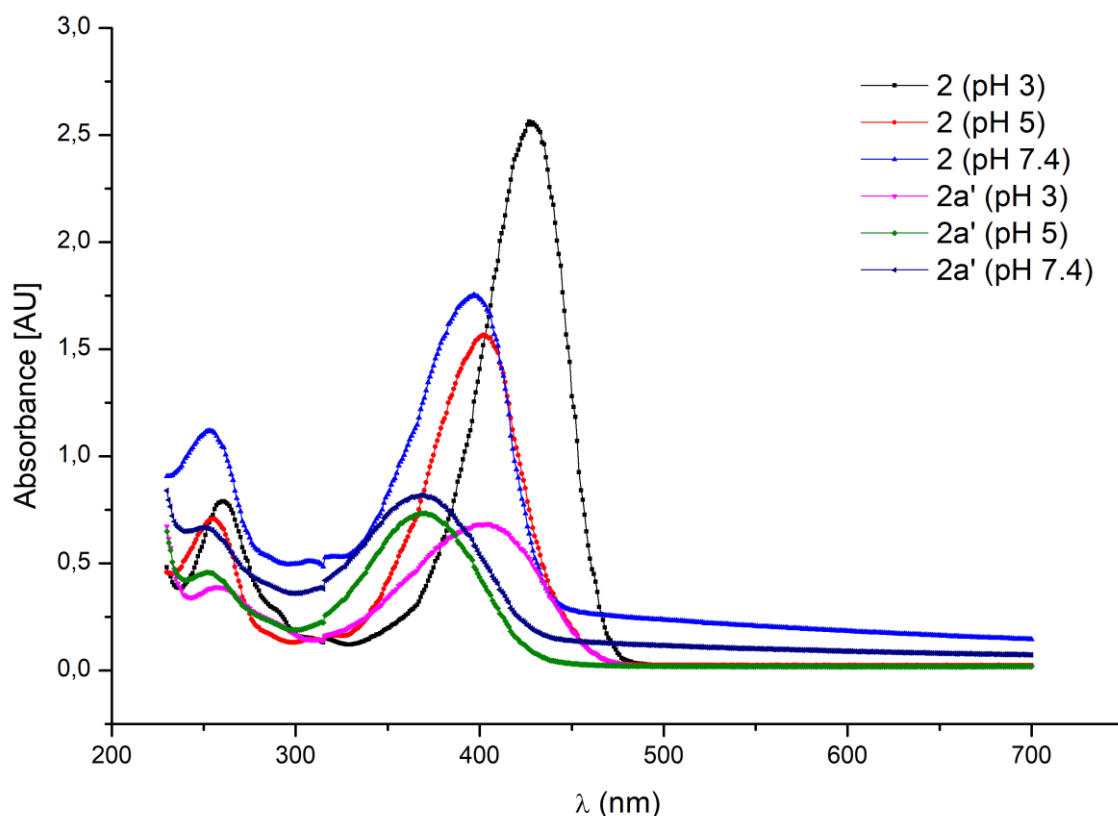

Figure 11S. UV-Vis absorption spectra of the isolated derivative **2a'** and its respective substrate **2** recorded at conditions identical to those applied for the hypochlorite sensing experiment (concentration of 150  $\mu$ M, various pH,  $\lambda_{\text{Ex}}=289$ , and the temperature of 25  $^{\circ}$ C).

Table 1S. Chromatographic, spectrophotometric, and mass spectrometric data for the coumarin derivatives **1-3** and their corresponding chlorinated products at pH 3 after 15 minutes of reaction with fivefold excess of hypochlorite.

| Compound No. | Compound name                                        | $t_{\text{ret}}$ [min] | $\lambda_{\text{max}}$ [nm] | $m/z$ [M+H] <sup>+</sup> | Composition [%] |
|--------------|------------------------------------------------------|------------------------|-----------------------------|--------------------------|-----------------|
| <b>1</b>     | 7-diethylamino-3-formylcoumarin                      | 7.9                    | 443                         | 246.05                   | 1.6             |
| <b>1a'</b>   | monochloro-7-diethylamino-3-formylcoumarin*          | 9.7                    | 433                         | 279.95                   | 2.0             |
| <b>1b</b>    | dichloro-7-diethylaminocoumarin*                     | 12.1                   | 366                         | 285.95                   | 8.7             |
| <b>2</b>     | 7-diethylaminocoumarin-3-carboxylic acid             | 8.1                    | 432                         | 262.00                   | 3.0             |
| <b>2a'</b>   | monochloro-7-diethylaminocoumarin-3-carboxylic acid* | 9.9                    | 411                         | 295.95                   | 2.1             |
| <b>1b</b>    | dichloro-7-diethylaminocoumarin*                     | 12.1                   | 366                         | 285.90                   | 2.6             |
| <b>3a'</b>   | monochloro-7-diethylamino-4-methylcoumarin*          | 10.2                   | 350                         | 266.00                   | 0.7             |
| <b>3</b>     | 7-diethylamino-4-methylcoumarin                      | 10.5                   | 375                         | 232.05                   | 0.1             |
| <b>3b</b>    | dichloro-7-diethylamino-4-methylcoumarin*            | 13.3                   | 360                         | 299.95                   | 9.8             |
